# Supplementary material for: Theoretical exploration of the structural, electronic and optical properties of g-C3N4/C3N heterostructures
Source: Royal Society of Chemistry journal article supplement (doi:10.1039/d2cp04559a), 2022-12-22
Supplement: d2cp04559a1.pdf [file d2cp04559a1.pdf]

**Table S1**

Calculated binding energy ( $E_b$ ), cohesive energy ( $E_{coh}$ ), the distance ( $d$ ) between g- $C_3N_4$  and  $C_3N$  layer for different stacked patterns.

|                | AA1    | AA2    | AB1    | AB2    | AB3    |
|----------------|--------|--------|--------|--------|--------|
| $E_b$ (eV)     | -1.021 | -1.166 | -1.212 | -1.143 | -1.188 |
| $E_{coh}$ (eV) | -2.965 | -2.978 | -2.982 | -2.976 | -2.980 |
| $d$ (Å)        | 3.259  | 2.890  | 2.988  | 2.968  | 2.969  |

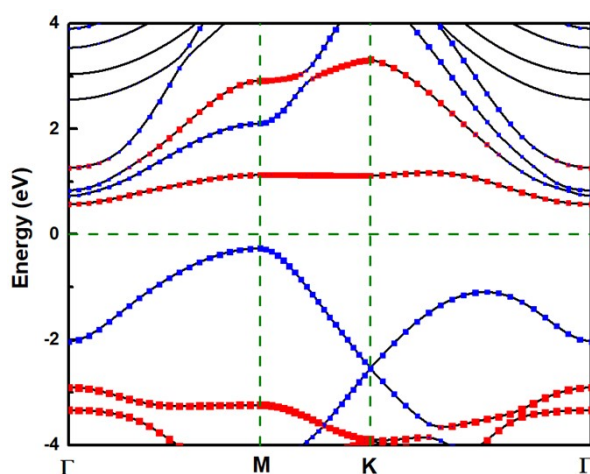

Fig.S1 Projected band structure of g- $C_3N_4/C_3N$  vdWH at HSE06 level.

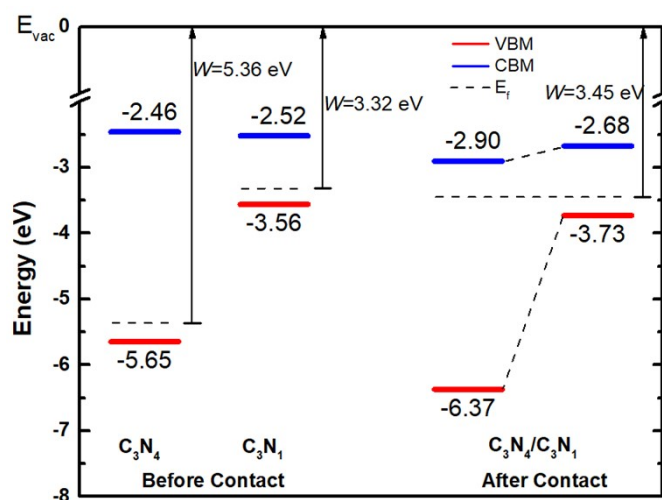

Fig.S2 Band alignments of g- $C_3N_4/C_3N$  vdWH at HSE06 level.

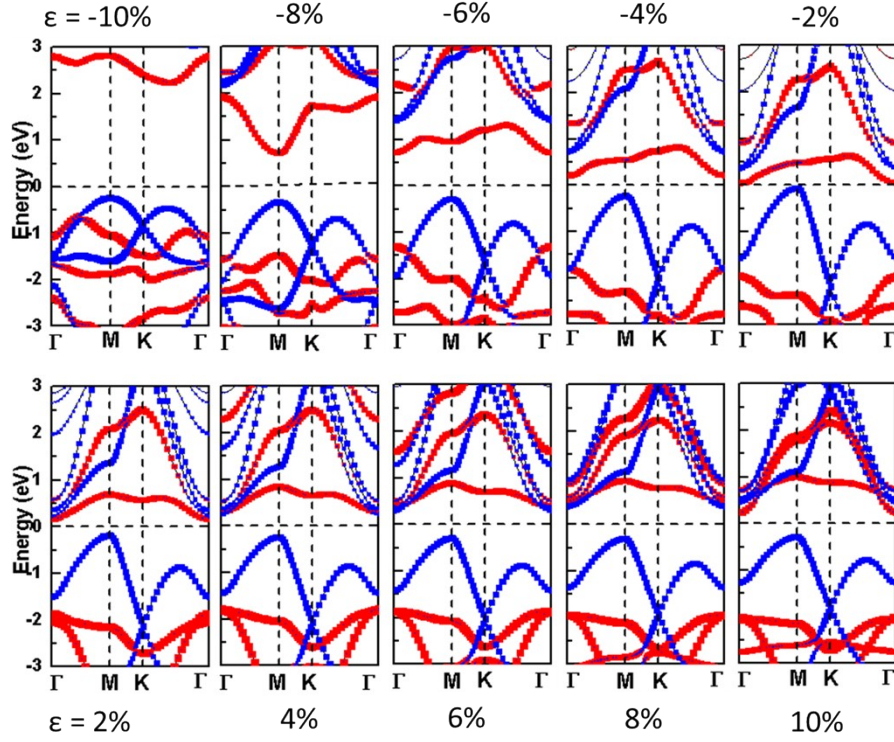

Fig.S3 Projected band structures of g-C<sub>3</sub>N<sub>4</sub>/C<sub>3</sub>N vdWH under the in-plane biaxial strains.

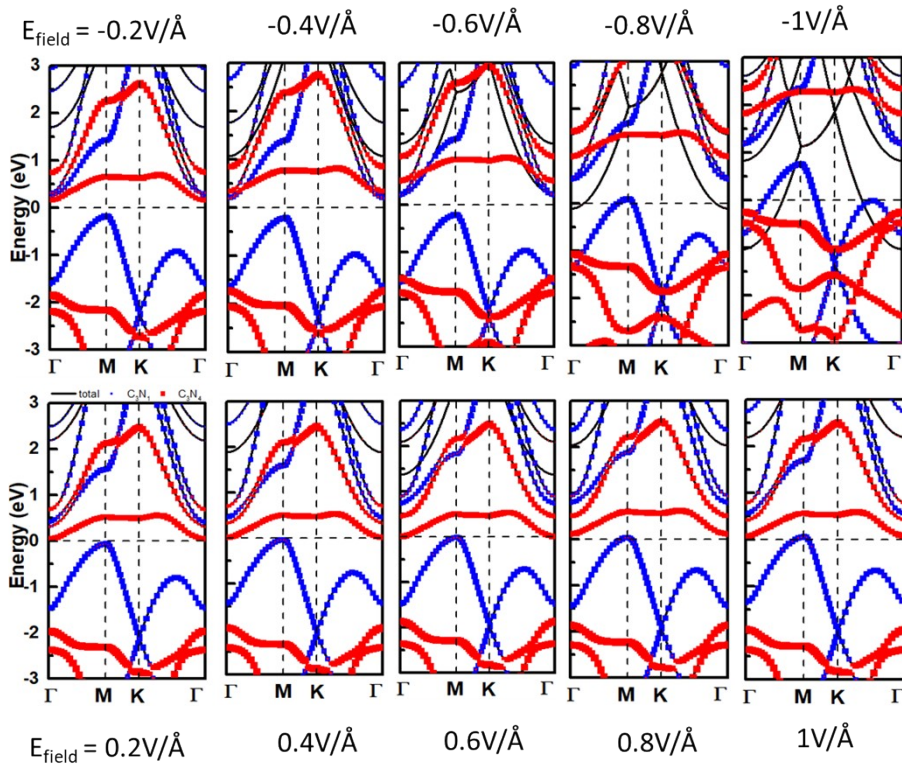

Fig.S4 Projected band structures of g-C<sub>3</sub>N<sub>4</sub>/C<sub>3</sub>N vdWH under different  $E_{\text{field}}$ .

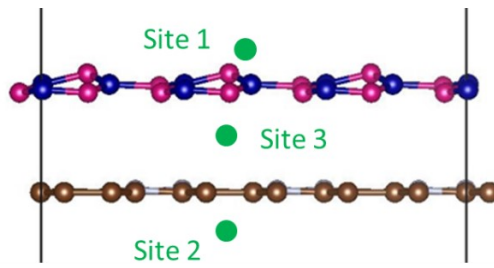

Fig.S5 Three sites of Ti atom at g-C<sub>3</sub>N<sub>4</sub>/C<sub>3</sub>N vdWH.

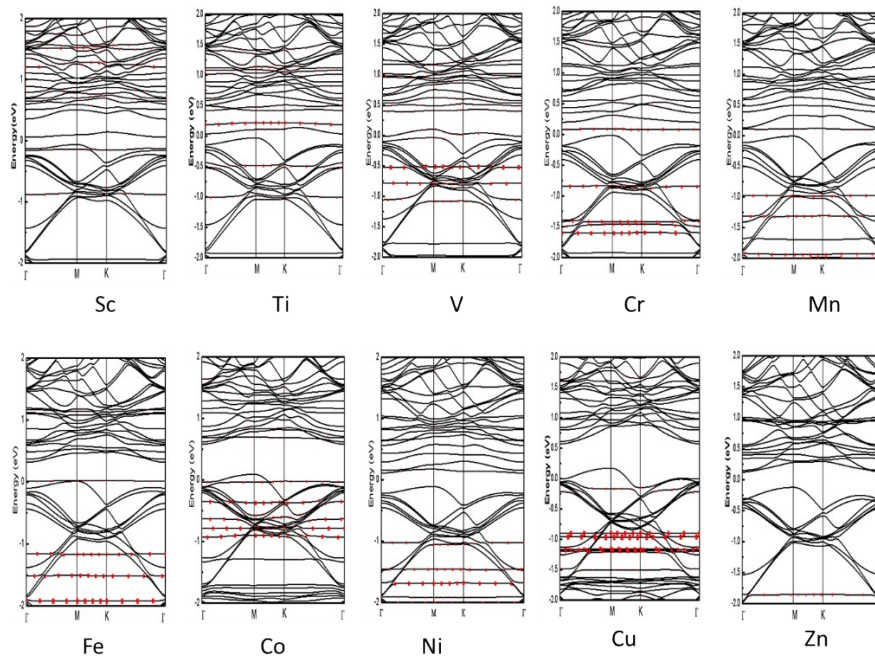

Fig.S6 Band structures of metal atoms adsorbed on g-C<sub>3</sub>N<sub>4</sub> surface of g-C<sub>3</sub>N<sub>4</sub>/C<sub>3</sub>N vdWH.

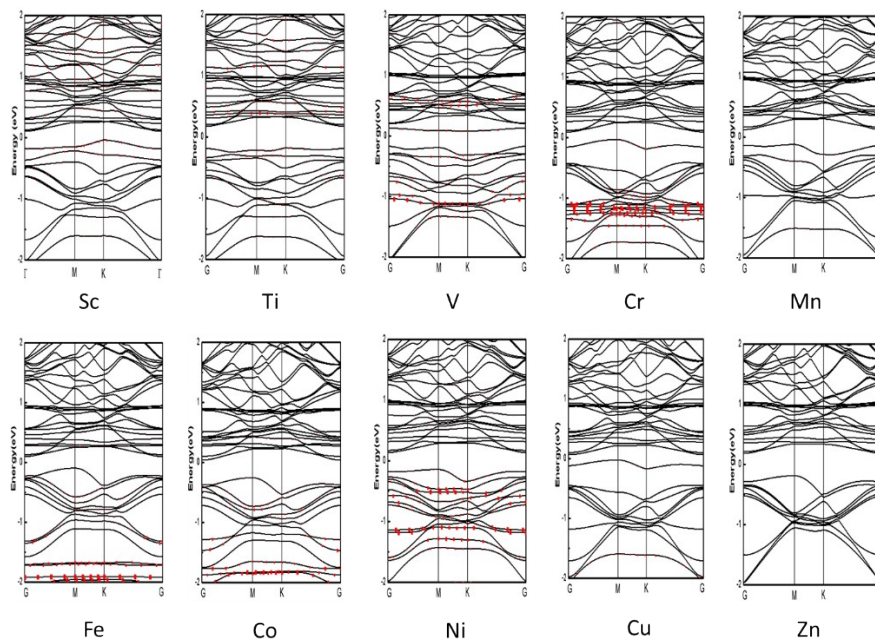

Fig.S7 Band structures of metal atoms adsorbed on  $C_3N$  surface of  $g-C_3N_4/C_3N$  vdWH.

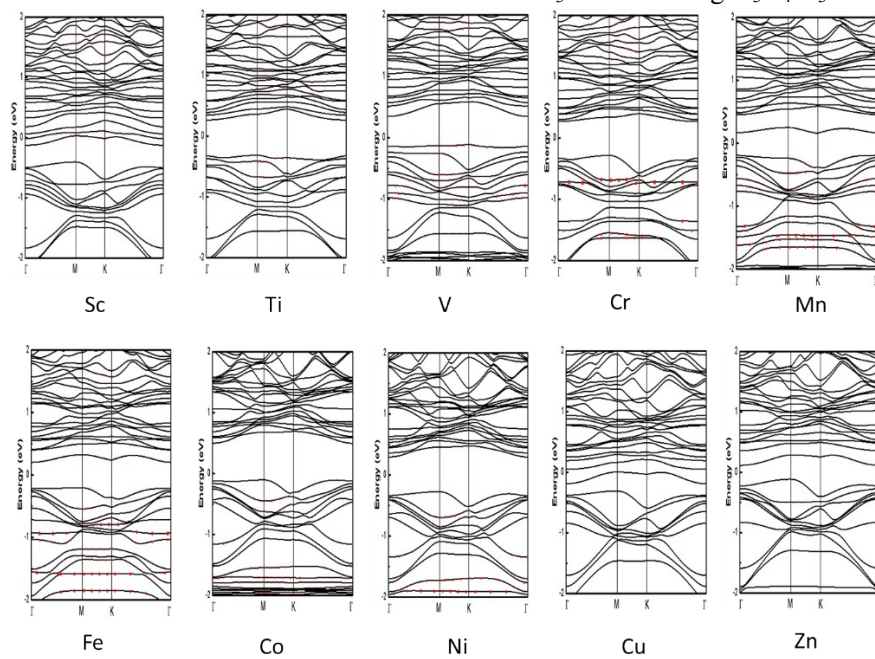

Fig.S8 Band structures of metal atoms embedded into the interlayer of  $g-C_3N_4/C_3N$  vdWH.
